# Supplementary material for: Self-association as a solubility limiting factor of riboflavin in aqueous media
Source: Royal Society of Chemistry journal article supplement (doi:10.1039/d4cp02074j), 2024-01-01
Supplement: d4cp02074j1.pdf [file d4cp02074j1.pdf]

# Self-association as solubility limiting factor of riboflavin in aqueous medium

Nadja Ulmann<sup>a,\*</sup>, Johnny Hioe<sup>a</sup>, Didier Touraud<sup>a</sup>, Dominik Horinek<sup>a</sup> and Werner Kunz<sup>a,\*</sup>

<sup>a</sup> Institute of Physical and Theoretical Chemistry, University of Regensburg, Universitätsstrasse 31, 93053 Regensburg, Germany

\* Corresponding authors: [Nadja.Ulmann@ur.de](mailto:Nadja.Ulmann@ur.de),  
[Werner.Kunz@ur.de](mailto:Werner.Kunz@ur.de),

Phone: +49 941 943-4026

Phone: +49 941 943-4044

## 9 Supplementary Material

### 9.1 Calibration curves for riboflavin, lumichrome and riboflavin 5'-monophosphate sodium salt

Table A1: Calibration curve for riboflavin in water at the UV-Vis spectrophotometer at 449 nm

| Slope (AU·kg·mmol <sup>-1</sup> ) | Intercept (AU)  | Correlation coefficient R <sup>2</sup> |
|-----------------------------------|-----------------|----------------------------------------|
| 12.353                            | 0.0028          | 0.9999                                 |
| 12.394                            | 0.0057          | 0.9999                                 |
| 12.133                            | 0.0025          | 0.9998                                 |
| <b>averaged</b>                   | <b>averaged</b> |                                        |
| 12.3 ± 0.1                        | 0.004 ± 0.001   |                                        |

Table A2: Calibration curve for lumichrome in water at the UV-Vis spectrophotometer for at 386 nm

| Slope (AU·kg·mmol <sup>-1</sup> ) | Intercept (AU)  | Correlation coefficient R <sup>2</sup> |
|-----------------------------------|-----------------|----------------------------------------|
| 12.5                              | 0.019           | 0.9784                                 |
| 11.6                              | 0.068           | 0.9937                                 |
| 11.0                              | 0.081           | 0.9957                                 |
| <b>averaged</b>                   | <b>averaged</b> | -                                      |
| 11.7 ± 0.6                        | 0.05 ± 0.03     | -                                      |

Table A3: Calibration curve for RF-PO<sub>4</sub> in water at the spectrophotometer for at 445 nm

| Slope (AU·kg·mmol <sup>-1</sup> ) | Intercept (AU)  | Correlation coefficient R <sup>2</sup> |
|-----------------------------------|-----------------|----------------------------------------|
| 11.02                             | 0.003           | 0.9998                                 |
| 11.01                             | 0.005           | 0.9999                                 |
| 11.21                             | 0.002           | 0.9998                                 |
| <b>averaged</b>                   | <b>averaged</b> | -                                      |
| 11.08 ± 0.003                     | 0.09 ± 0.001    | -                                      |

## 20 9.2 Riboflavin crystal obtained in presence of 3,4-dimethoxycinnamic 21 acid

22 (The CheckCif report of this riboflavin crystal contains a Level B alert, because the ribityl chain  
23 is rather flexible in the solvent prior to crystallization, which apparently leads to a slightly distinct  
24 position of the hydroxy groups on each riboflavin molecule in the final crystal. However, Single  
25 Crystal X-Ray Diffraction Analysis enables only the determination of the average position of  
26 the entire ribityl chain and needle shaped crystals come along with higher uncertainties.

27 Still, in this case, a Level B alert is not critical. Of major importance for the message of our  
28 article is not the exact position of the hydroxy groups on the ribityl chain, but the global direction  
29 of the ribityl chain in relation to the directly attached riboflavin molecules, i.e. the syn-orientation  
30 of the ribityl chains of directly neighbored riboflavin molecules and  $\pi$ -stacking. As we still  
31 cannot just ignore a Level B alert, we present another crystal structure of riboflavin in section  
32 9.3.)

33

34

35  $C_{17}H_{20}N_4O_6$ ,  $M_r = 376.37$ , orthorhombic,  $P2_12_12_1$  (No. 19),  $a = 5.31333(5) \text{ \AA}$ ,  $b =$   
36  $15.11045(13) \text{ \AA}$ ,  $c = 20.03449(17) \text{ \AA}$ ,  $\alpha = \beta = \gamma = 90^\circ$ ,  $V = 1608.51(2) \text{ \AA}^3$ ,  $Z = 4$ ,  $Z' = 1$ ,  $\mu(\text{Cu}$   
37  $K_\alpha) = 1.009$ , 16921 reflections measured, 3236 unique ( $R_{\text{int}} = 0.0260$ ) which were used in all  
38 calculations. The final  $wR2$  was 0.0812 (all data) and  $R1$  was 0.0292 ( $I \geq 2 \sigma(I)$ ).

39

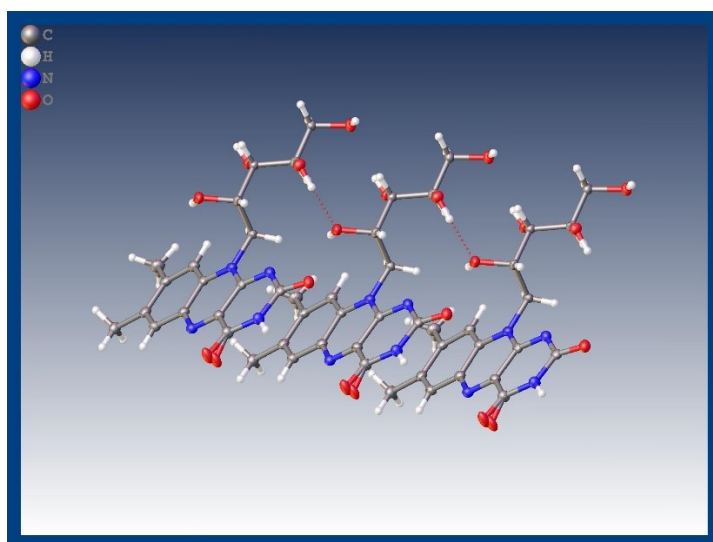

40

41

42 *Figure A1: Crystal structure of pure RF needles obtained via the liquid diffusion method from a*  
43 *water/acetonitrile (50/50 (w/w)) solution in presence of 3,4-dimethoxycinnamic acid*

44

45  
46  
47

Table A4: Compound characterization of the riboflavin crystal obtained from a water/acetonitrile (50/50 (w/w)) solution saturated with 3,4-dimethoxycinnamic acid and riboflavin.

| Parameter                                   | Obtained value | Parameter                                    | Obtained value |
|---------------------------------------------|----------------|----------------------------------------------|----------------|
| <b>Formula</b>                              | C17H20N4O6     | <b>Z</b>                                     | 4              |
| $\rho_{\text{calc.}}$ (g·cm <sup>-3</sup> ) | 1.554          | <b>Z'</b>                                    | 1              |
| $\mu$ ·mm <sup>-1</sup>                     | 1.009          | $\lambda$ (Å)                                | 1.54184        |
| <b>Formula Weight</b>                       | 376.37         | <b>Radiation type</b>                        | Cu K $\alpha$  |
| <b>Color</b>                                | Clear yellow   | $\theta_{\text{min}}$ (°)                    | 3.664          |
| <b>Shape</b>                                | Prism-shaped   | $\theta_{\text{max}}$ (°)                    | 75.054         |
| <b>Size (mm<sup>3</sup>)</b>                | 0.28×0.04×0.03 | <b>Measured Refl's.</b>                      | 16921          |
| <b>T (K)</b>                                | 123.01(10)     | <b>Indep't Refl's</b>                        | 3236           |
| <b>Crystal System</b>                       | orthorhombic   | <b>Refl's I<math>\geq 2 \sigma</math>(I)</b> | 3105           |
| <b>Flack Parameter</b>                      | 0.2(2)         | <b>R<sub>int</sub></b>                       | 0.0260         |
| <b>Hooft Parameter</b>                      | 0.06(5)        | <b>Parameters</b>                            | 328            |
| <b>Space Group</b>                          | P212121        | <b>Restraints</b>                            | 6              |
| <b>a (Å)</b>                                | 5.31333(5)     | <b>Largest Peak</b>                          | 0.424          |
| <b>b (Å)</b>                                | 15.11045(13)   | <b>Deepest Hole</b>                          | -0.335         |
| <b>c (Å)</b>                                | 20.03449(17)   | <b>Goof</b>                                  | 1.038          |
| $\alpha$ (°)                                | 90             | <b>wR<sub>2</sub> (all data)</b>             | 0.0812         |
| $\beta$ (°)                                 | 90             | <b>wR<sub>2</sub></b>                        | 0.0801         |
| $\gamma$ (°)                                | 90             | <b>R<sub>1</sub>(all data)</b>               | 0.0309         |
| <b>V (Å<sup>3</sup>)</b>                    | 1608.51(2)     | <b>R<sub>1</sub></b>                         | 0.0292         |

48

49  
50  
51  
52

Table A5: Fractional Atomic Coordinates ( $\times 10^4$ ) and Equivalent Isotropic Displacement Parameters ( $\text{Å}^2 \times 10^3$ ) for the riboflavin crystal obtained from a water/acetonitrile (50/50 (w/w)) solution saturated with 3,4-dimethoxycinnamic acid and riboflavin.  $U_{\text{eq}}$  is defined as 1/3 of the trace of the orthogonalized  $U_{ij}$ .

| Atom | x        | y          | z          | $U_{\text{eq}}$ |
|------|----------|------------|------------|-----------------|
| O4   | 6079(3)  | 5757.2(9)  | 6020.6(7)  | 18.4(3)         |
| O6   | 12784(3) | 6098.0(10) | 4901.2(7)  | 20.2(3)         |
| O2   | 13984(3) | 8843.7(10) | 7656.8(7)  | 22.6(3)         |
| O5   | 10762(3) | 7489.1(9)  | 5706.8(7)  | 19.7(3)         |
| O3   | 4133(3)  | 7269.8(11) | 6725.0(7)  | 23.4(3)         |
| O1   | 8930(90) | 9300(30)   | 9390(20)   | 28(4)           |
| N1   | 7216(3)  | 6998.0(11) | 7856.4(8)  | 16.8(4)         |
| N4   | 10559(3) | 7959.7(11) | 7710.7(8)  | 18.6(4)         |
| N3   | 11227(4) | 9133.6(11) | 8492.9(9)  | 19.7(4)         |
| N2   | 5906(3)  | 7867.2(11) | 9041.9(8)  | 18.0(4)         |
| C12  | 8595(4)  | 7708.8(13) | 8064.6(10) | 16.7(4)         |
| C9   | 7771(4)  | 8132.0(13) | 8674.9(10) | 17.7(4)         |
| C15  | 7070(4)  | 6632.5(13) | 5964.2(10) | 16.0(4)         |
| C11  | 12002(4) | 8644.7(13) | 7936.7(10) | 19.2(4)         |
| C1   | 5224(4)  | 6680.3(13) | 8238.5(9)  | 17.1(4)         |
| C10  | 9159(4)  | 8943.7(14) | 8881.4(10) | 21.1(4)         |
| C13  | 7891(4)  | 6592.2(13) | 7207.8(10) | 17.6(4)         |
| C2   | 3839(4)  | 5919.3(14) | 8072.8(10) | 20.0(4)         |
| C5   | 2621(4)  | 6828.0(14) | 9240.0(10) | 18.7(4)         |
| C4   | 1265(4)  | 6087.0(13) | 9078.2(10) | 19.5(4)         |
| C14  | 6757(4)  | 7129.3(13) | 6628.7(10) | 17.1(4)         |
| C3   | 1934(4)  | 5617.0(13) | 8485.2(10) | 20.1(4)         |
| C6   | 4618(4)  | 7135.4(13) | 8838.8(10) | 17.9(4)         |
| C17  | 10153(4) | 6181.6(14) | 5052.9(10) | 18.0(4)         |

|            |          |            |            |         |
|------------|----------|------------|------------|---------|
| <b>C16</b> | 9821(4)  | 6600.1(13) | 5739.8(10) | 16.4(4) |
| <b>C8</b>  | -828(4)  | 5762.0(14) | 9519.2(11) | 22.0(4) |
| <b>C7</b>  | 582(5)   | 4778.3(14) | 8306.0(11) | 25.6(5) |
| <b>O1A</b> | 8430(40) | 9426(13)   | 9339(8)    | 27(2)   |

53

54 Table A6: Anisotropic displacement parameters ( $\times 10^4$ ) for the riboflavin crystal obtained from a  
55 water/acetonitrile (50/50 (w/w)) solution saturated with 3,4-dimethoxycinnamic acid and riboflavin. The  
56 anisotropic displacement factor exponent takes the form:  $-2^2[h^2a^{*2} \times U_{11} + \dots + 2hka^* \times b^* \times U_{12}]$

| Atom       | $U_{11}$ | $U_{22}$ | $U_{33}$ | $U_{23}$ | $U_{13}$ | $U_{12}$ |
|------------|----------|----------|----------|----------|----------|----------|
| <b>O4</b>  | 16.7(7)  | 19.7(7)  | 18.7(7)  | -0.8(5)  | -1.8(6)  | -2.0(6)  |
| <b>O6</b>  | 17.5(7)  | 21.2(7)  | 21.7(7)  | 1.5(6)   | 4.6(6)   | 1.2(6)   |
| <b>O2</b>  | 18.2(8)  | 27.6(7)  | 22.1(7)  | 2.4(6)   | 2.5(6)   | 1.8(6)   |
| <b>O5</b>  | 19.3(7)  | 18.5(7)  | 21.3(7)  | 1.4(5)   | -1.7(6)  | -2.3(6)  |
| <b>O3</b>  | 17.4(8)  | 33.8(8)  | 19.1(7)  | -0.8(6)  | 0.5(6)   | 7.6(6)   |
| <b>O1</b>  | 28(8)    | 27(7)    | 30(5)    | -12(5)   | 12(6)    | -1(6)    |
| <b>N1</b>  | 18.7(8)  | 18.4(8)  | 13.4(7)  | -1.8(6)  | -1.2(7)  | 3.5(7)   |
| <b>N4</b>  | 18.7(9)  | 20.6(8)  | 16.6(7)  | 0.2(6)   | 0.5(7)   | 3.3(7)   |
| <b>N3</b>  | 19.4(9)  | 19.0(8)  | 20.8(8)  | -1.9(7)  | 1.3(7)   | -2.5(7)  |
| <b>N2</b>  | 19.2(9)  | 18.6(8)  | 16.2(7)  | -0.5(6)  | -0.9(7)  | 1.3(7)   |
| <b>C12</b> | 17.6(10) | 16.9(9)  | 15.7(9)  | 0.9(7)   | -1.0(8)  | 5.5(8)   |
| <b>C9</b>  | 19.5(10) | 18.5(9)  | 15.1(8)  | -0.6(7)  | -1.2(8)  | 2.8(8)   |
| <b>C15</b> | 15.9(9)  | 17.4(9)  | 14.6(9)  | 0.0(7)   | -1.9(8)  | 0.3(8)   |
| <b>C11</b> | 19.5(10) | 21.0(9)  | 16.9(9)  | 3.6(7)   | -0.5(8)  | 4.0(8)   |
| <b>C1</b>  | 17.4(9)  | 18.8(9)  | 15.2(8)  | 1.5(7)   | -1.8(8)  | 3.6(8)   |
| <b>C10</b> | 21.4(10) | 20.9(9)  | 21.0(9)  | -1.2(7)  | 1.0(9)   | -1.5(8)  |
| <b>C13</b> | 19.3(10) | 20.0(9)  | 13.4(9)  | -2.1(7)  | -0.1(8)  | 3.0(8)   |
| <b>C2</b>  | 22.5(11) | 19.6(9)  | 18.0(9)  | -1.7(7)  | -2.7(8)  | 2.9(9)   |
| <b>C5</b>  | 21.6(10) | 19.9(9)  | 14.6(9)  | -0.8(7)  | -0.7(8)  | 2.0(8)   |
| <b>C4</b>  | 18.0(10) | 21.9(9)  | 18.7(9)  | 3.6(7)   | -4.0(8)  | 1.4(8)   |
| <b>C14</b> | 15.5(10) | 19.7(8)  | 16.2(9)  | -0.7(7)  | -0.5(8)  | 3.0(8)   |
| <b>C3</b>  | 21.3(11) | 20.0(9)  | 18.9(9)  | 1.2(7)   | -6.3(8)  | 1.8(8)   |
| <b>C6</b>  | 19.7(10) | 17.9(8)  | 16.2(9)  | 0.5(7)   | -3.1(8)  | 2.4(8)   |
| <b>C17</b> | 15.6(10) | 20.4(9)  | 18.2(9)  | 0.9(7)   | 0.7(8)   | 0.8(8)   |
| <b>C16</b> | 17.0(9)  | 15.9(8)  | 16.3(9)  | 2.5(7)   | -1.1(8)  | 1.1(8)   |
| <b>C8</b>  | 20.1(11) | 23.2(10) | 22.6(10) | 3.1(8)   | -1.1(9)  | -1.4(9)  |
| <b>C7</b>  | 28.6(13) | 22.9(10) | 25.3(10) | -2.7(8)  | -3.2(10) | -2.9(9)  |
| <b>O1A</b> | 23(4)    | 25(4)    | 32(2)    | -13(2)   | 11(3)    | -6(3)    |

57

58 Table A7: Bond lengths in Å for the riboflavin crystal obtained from a water/acetonitrile (50/50 (w/w))  
59 solution saturated with 3,4-dimethoxycinnamic acid and riboflavin

| Atom | Atom | Length (Å) | Atom | Atom | Length (Å) |
|------|------|------------|------|------|------------|
| O4   | C15  | 1.428(2)   | C12  | C9   | 1.448(3)   |
| O6   | C17  | 1.436(3)   | C9   | C10  | 1.490(3)   |
| O2   | C11  | 1.230(3)   | C15  | C14  | 1.537(3)   |
| O5   | C16  | 1.435(2)   | C15  | C16  | 1.530(3)   |
| O3   | C14  | 1.423(3)   | C1   | C2   | 1.405(3)   |
| O1   | C10  | 1.16(4)    | C1   | C6   | 1.422(3)   |
| N1   | C12  | 1.366(3)   | C10  | O1A  | 1.234(16)  |
| N1   | C1   | 1.392(3)   | C13  | C14  | 1.539(3)   |
| N1   | C13  | 1.481(2)   | C2   | C3   | 1.384(3)   |
| N4   | C12  | 1.317(3)   | C5   | C4   | 1.370(3)   |
| N4   | C11  | 1.365(3)   | C5   | C6   | 1.410(3)   |
| N3   | C11  | 1.399(3)   | C4   | C3   | 1.429(3)   |
| N3   | C10  | 1.377(3)   | C4   | C8   | 1.503(3)   |
| N2   | C9   | 1.297(3)   | C3   | C7   | 1.500(3)   |
| N2   | C6   | 1.363(3)   | C17  | C16  | 1.525(3)   |

4

60  
61  
62

Table A8: Bond angles for the riboflavin crystal obtained from a water/acetonitrile (50/50 (w/w)) solution saturated with 3,4-dimethoxycinnamic acid and riboflavin.

| Atom | Atom | Atom | Angle (°)  | Atom | Atom | Atom | Angle (°)  |
|------|------|------|------------|------|------|------|------------|
| C12  | N1   | C1   | 120.76(16) | N3   | C10  | C9   | 114.19(17) |
| C12  | N1   | C13  | 117.62(17) | O1A  | C10  | N3   | 123.2(6)   |
| C1   | N1   | C13  | 121.61(17) | O1A  | C10  | C9   | 122.5(6)   |
| C12  | N4   | C11  | 118.97(17) | N1   | C13  | C14  | 110.38(17) |
| C10  | N3   | C11  | 125.10(18) | C3   | C2   | C1   | 120.80(18) |
| C9   | N2   | C6   | 117.70(17) | C4   | C5   | C6   | 122.01(19) |
| N1   | C12  | C9   | 116.30(18) | C5   | C4   | C3   | 118.16(19) |
| N4   | C12  | N1   | 119.15(17) | C5   | C4   | C8   | 121.14(19) |
| N4   | C12  | C9   | 124.55(19) | C3   | C4   | C8   | 120.69(19) |
| N2   | C9   | C12  | 125.00(19) | O3   | C14  | C15  | 107.23(16) |
| N2   | C9   | C10  | 118.35(18) | O3   | C14  | C13  | 111.11(17) |
| C12  | C9   | C10  | 116.64(18) | C15  | C14  | C13  | 110.66(16) |
| O4   | C15  | C14  | 110.10(15) | C2   | C3   | C4   | 120.94(19) |
| O4   | C15  | C16  | 110.25(16) | C2   | C3   | C7   | 119.08(19) |
| C16  | C15  | C14  | 111.93(16) | C4   | C3   | C7   | 120.0(2)   |
| O2   | C11  | N4   | 120.96(19) | N2   | C6   | C1   | 122.09(19) |
| O2   | C11  | N3   | 119.1(2)   | N2   | C6   | C5   | 118.38(18) |
| N4   | C11  | N3   | 119.97(19) | C5   | C6   | C1   | 119.54(19) |
| N1   | C1   | C2   | 123.41(18) | O6   | C17  | C16  | 109.88(16) |
| N1   | C1   | C6   | 118.06(18) | O5   | C16  | C15  | 108.45(15) |
| C2   | C1   | C6   | 118.50(19) | O5   | C16  | C17  | 107.85(15) |
| O1   | C10  | N3   | 119(2)     | C17  | C16  | C15  | 112.88(16) |
| O1   | C10  | C9   | 125(2)     |      |      |      |            |

63

64  
65  
66

Table A9: Torsion angles for the riboflavin crystal obtained from a water/acetonitrile (50/50 (w/w)) solution saturated with 3,4-dimethoxycinnamic acid and riboflavin.

| Atom | Atom | Atom | Atom | Angle (°)   |
|------|------|------|------|-------------|
| O4   | C15  | C14  | O3   | -68.0(2)    |
| O4   | C15  | C14  | C13  | 53.3(2)     |
| O4   | C15  | C16  | O5   | -178.47(15) |
| O4   | C15  | C16  | C17  | 62.1(2)     |
| O6   | C17  | C16  | O5   | 65.5(2)     |
| O6   | C17  | C16  | C15  | -174.68(16) |
| N1   | C12  | C9   | N2   | 2.6(3)      |
| N1   | C12  | C9   | C10  | -176.04(18) |
| N1   | C1   | C2   | C3   | 177.67(19)  |
| N1   | C1   | C6   | N2   | 0.6(3)      |
| N1   | C1   | C6   | C5   | -179.61(17) |
| N1   | C13  | C14  | O3   | -51.6(2)    |
| N1   | C13  | C14  | C15  | -170.59(17) |
| N4   | C12  | C9   | N2   | -176.88(19) |
| N4   | C12  | C9   | C10  | 4.5(3)      |
| N2   | C9   | C10  | O1   | 11(3)       |
| N2   | C9   | C10  | N3   | 175.07(19)  |
| N2   | C9   | C10  | O1A  | -8.6(15)    |
| C12  | N1   | C1   | C2   | -175.80(18) |
| C12  | N1   | C1   | C6   | 2.1(3)      |
| C12  | N1   | C13  | C14  | -80.6(2)    |
| C12  | N4   | C11  | O2   | 172.90(18)  |
| C12  | N4   | C11  | N3   | -7.3(3)     |
| C12  | C9   | C10  | O1   | -171(3)     |
| C12  | C9   | C10  | N3   | -6.2(3)     |

|     |     |     |     |             |
|-----|-----|-----|-----|-------------|
| C12 | C9  | C10 | O1A | 170.1(15)   |
| C9  | N2  | C6  | C1  | -1.6(3)     |
| C9  | N2  | C6  | C5  | 178.65(18)  |
| C11 | N4  | C12 | N1  | -177.01(17) |
| C11 | N4  | C12 | C9  | 2.5(3)      |
| C11 | N3  | C10 | O1  | 167(3)      |
| C11 | N3  | C10 | C9  | 1.7(3)      |
| C11 | N3  | C10 | O1A | -174.5(15)  |
| C1  | N1  | C12 | N4  | 176.01(17)  |
| C1  | N1  | C12 | C9  | -3.5(3)     |
| C1  | N1  | C13 | C14 | 98.4(2)     |
| C1  | C2  | C3  | C4  | 2.2(3)      |
| C1  | C2  | C3  | C7  | -177.19(19) |
| C10 | N3  | C11 | O2  | -174.96(19) |
| C10 | N3  | C11 | N4  | 5.3(3)      |
| C13 | N1  | C12 | N4  | -5.0(3)     |
| C13 | N1  | C12 | C9  | 175.49(18)  |
| C13 | N1  | C1  | C2  | 5.3(3)      |
| C13 | N1  | C1  | C6  | -176.86(17) |
| C2  | C1  | C6  | N2  | 178.58(18)  |
| C2  | C1  | C6  | C5  | -1.6(3)     |
| C5  | C4  | C3  | C2  | -2.3(3)     |
| C5  | C4  | C3  | C7  | 177.09(19)  |
| C4  | C5  | C6  | N2  | -178.67(19) |
| C4  | C5  | C6  | C1  | 1.5(3)      |
| C14 | C15 | C16 | O5  | -55.6(2)    |
| C14 | C15 | C16 | C17 | -174.99(16) |
| C6  | N2  | C9  | C12 | -0.1(3)     |
| C6  | N2  | C9  | C10 | 178.55(18)  |
| C6  | C1  | C2  | C3  | -0.2(3)     |
| C6  | C5  | C4  | C3  | 0.4(3)      |
| C6  | C5  | C4  | C8  | 178.93(19)  |
| C16 | C15 | C14 | O3  | 168.99(16)  |
| C16 | C15 | C14 | C13 | -69.7(2)    |
| C8  | C4  | C3  | C2  | 179.19(19)  |
| C8  | C4  | C3  | C7  | -1.4(3)     |

67

68

69

70

71

72

Table A10: Hydrogen fractional atomic coordinates ( $\times 10^4$ ) and equivalent isotropic displacement parameters ( $\text{\AA}^2 \times 10^3$ ) for the riboflavin crystal obtained from a water/acetonitrile (50/50 (w/w)) solution saturated with 3,4-dimethoxycinnamic acid and riboflavin.  $U_{eq}$  is defined as 1/3 of the trace of the orthogonalized  $U_{ij}$ .

| Atom | x         | y        | z        | $U_{eq}$ |
|------|-----------|----------|----------|----------|
| H3   | 3475.96   | 6808.06  | 6880.5   | 35       |
| H14  | 7628.6    | 7714.53  | 6598.9   | 21       |
| H17A | 9480(40)  | 5600(16) | 5020(11) | 11(5)    |
| H17B | 9350(50)  | 6539(16) | 4699(12) | 19(6)    |
| H13A | 7210(50)  | 5974(17) | 7200(11) | 18(6)    |
| H5A  | 2300(50)  | 7120(18) | 9621(13) | 20(6)    |
| H7A  | 1370(60)  | 4520(20) | 7921(15) | 37(8)    |
| H6   | 13400(60) | 6600(20) | 4765(16) | 41(9)    |
| H16  | 10720(50) | 6301(15) | 6040(12) | 14(6)    |
| H8A  | -2430(60) | 5700(20) | 9279(14) | 33(8)    |
| H8B  | -1160(60) | 6150(20) | 9876(15) | 37(8)    |
| H2   | 4230(50)  | 5581(16) | 7656(12) | 19(6)    |
| H13B | 9780(60)  | 6606(18) | 7191(12) | 25(6)    |
| H5   | 11890(70) | 7470(20) | 6053(18) | 51(10)   |
| H3A  | 12160(60) | 9550(20) | 8626(14) | 30(7)    |

|            |           |          |          |       |
|------------|-----------|----------|----------|-------|
| <b>H15</b> | 6130(40)  | 6962(15) | 5633(11) | 12(5) |
| <b>H8C</b> | -460(60)  | 5180(20) | 9730(14) | 36(8) |
| <b>H7B</b> | 730(60)   | 4360(20) | 8680(15) | 36(8) |
| <b>H7C</b> | -1210(80) | 4890(20) | 8252(17) | 50(9) |
| <b>H4</b>  | 5020(60)  | 5720(20) | 5777(15) | 31(8) |

73

74

### 75 9.3 Riboflavin crystal obtained in presence of cinnamic acid

76  $C_{17}H_{20}N_4O_6$ ,  $M_r = 376.37$ , orthorhombic,  $P2_12_12_1$  (No. 19),  $a = 5.30940(10) \text{ \AA}$ ,  $b =$   
77  $15.11770(10) \text{ \AA}$ ,  $c = 20.0373(2) \text{ \AA}$ ,  $\alpha = \beta = \gamma = 90^\circ$ ,  $V = 1608.31(4) \text{ \AA}^3$ ,  $Z = 4$ ,  $Z' = 1$ ,  $\mu(\text{Cu } K_\alpha) =$   
78  $1.009$ , 14730 reflections measured, 3253 unique ( $R_{\text{int}} = 0.0222$ ) which were used in all  
79 calculations. The final  $wR_2$  was 0.0664 (all data) and  $R_1$  was 0.0263 ( $I \geq 2 \sigma(I)$ ).

80

81

82

83

*Table A11: Compound characterization for the riboflavin crystal obtained from a water/acetonitrile (50/50 (w/w)) solution saturated with cinnamic acid and riboflavin.*

| Parameter                                             | Obtained value       | Parameter                                     | Obtained value |
|-------------------------------------------------------|----------------------|-----------------------------------------------|----------------|
| <b>Formula</b>                                        | $C_{17}H_{20}N_4O_6$ | <b>Z</b>                                      | 4              |
| $\rho_{\text{calc.}} (\text{g} \cdot \text{cm}^{-3})$ | 1.554                | <b>Z'</b>                                     | 1              |
| $\mu \cdot \text{mm}^{-1}$                            | 1.009                | $\lambda (\text{ \AA})$                       | 1.54184        |
| <b>Formula Weight</b>                                 | 376.37               | <b>Radiation type</b>                         | Cu $K_\alpha$  |
| <b>Color</b>                                          | clear yellow         | $\theta_{\text{min}} (^\circ)$                | 3.663          |
| <b>Shape</b>                                          | needle-shaped        | $\theta_{\text{max}} (^\circ)$                | 74.975         |
| <b>Size (mm<sup>3</sup>)</b>                          | 0.22×0.03×0.02       | <b>Measured Refl's.</b>                       | 14730          |
| <b>T (K)</b>                                          | 123.00(10)           | <b>Indep't Refl's</b>                         | 3253           |
| <b>Crystal System</b>                                 | orthorhombic         | <b>Refl's <math>I \geq 2 \sigma(I)</math></b> | 3077           |
| <b>Flack Parameter</b>                                | -0.22(7)             | <b><math>R_{\text{int}}</math></b>            | 0.0222         |
| <b>Hooft Parameter</b>                                | -0.25(6)             | <b>Parameters</b>                             | 324            |
| <b>Space Group</b>                                    | $P2_12_12_1$         | <b>Restraints</b>                             | 0              |
| <b>a ( \AA)</b>                                       | 5.30940(10)          | <b>Largest Peak</b>                           | 0.191          |
| <b>b ( \AA)</b>                                       | 15.11770(10)         | <b>Deepest Hole</b>                           | -0.152         |
| <b>c ( \AA)</b>                                       | 20.0373(2)           | <b>GooF</b>                                   | 1.037          |
| $\alpha (^\circ)$                                     | 90                   | <b><math>wR_2</math> (all data)</b>           | 0.0664         |
| $\beta (^\circ)$                                      | 90                   | <b><math>wR_2</math></b>                      | 0.0652         |
| $\gamma (^\circ)$                                     | 90                   | <b><math>R_1</math>(all data)</b>             | 0.0288         |
| <b>V ( \AA<sup>3</sup>)</b>                           | 1608.31(4)           | <b><math>R_1</math></b>                       | 0.0263         |

84

85

86

87  
88  
89  
90  
91

Table A12: Fractional Atomic Coordinates ( $\times 10^4$ ) and Equivalent Isotropic Displacement Parameters ( $\text{\AA}^2 \times 10^3$ ) for the riboflavin crystal obtained from a water/acetonitrile (50/50 (w/w)) solution saturated with cinnamic acid and riboflavin.  $U_{eq}$  is defined as 1/3 of the trace of the orthogonalized  $U_{ij}$ .

| Atom | x        | y          | z          | $U_{eq}$ |
|------|----------|------------|------------|----------|
| O4   | 6068(3)  | 5756.7(8)  | 6020.8(7)  | 15.0(3)  |
| O6   | 12776(3) | 6097.7(9)  | 4900.2(7)  | 16.5(3)  |
| O2   | 13988(3) | 8844.8(9)  | 7657.9(7)  | 18.6(3)  |
| O5   | 10763(3) | 7487.5(8)  | 5707.0(7)  | 15.6(3)  |
| O3   | 4120(3)  | 7264.1(9)  | 6725.1(7)  | 19.8(3)  |
| O1   | 8528(3)  | 9401.8(10) | 9348.5(8)  | 30.2(4)  |
| N1   | 7218(3)  | 6997.8(10) | 7856.4(7)  | 13.7(3)  |
| N4   | 10558(3) | 7960.9(10) | 7710.8(8)  | 15.0(3)  |
| N3   | 11231(3) | 9134.5(10) | 8492.7(8)  | 16.2(3)  |
| N2   | 5908(3)  | 7869.0(9)  | 9042.0(8)  | 14.2(3)  |
| C12  | 8597(4)  | 7709.7(11) | 8066.0(9)  | 13.3(4)  |
| C9   | 7775(4)  | 8133.5(12) | 8673.7(9)  | 14.5(4)  |
| C15  | 7075(3)  | 6631.9(11) | 5965.1(9)  | 12.4(3)  |
| C13  | 7893(4)  | 6595.0(12) | 7207.4(9)  | 13.9(4)  |
| C11  | 11999(4) | 8645.7(12) | 7937.0(9)  | 15.7(4)  |
| C1   | 5226(4)  | 6680.9(11) | 8238.9(9)  | 13.7(4)  |
| C2   | 3837(4)  | 5920.4(12) | 8074.7(9)  | 15.9(4)  |
| C4   | 1269(4)  | 6087.0(12) | 9077.6(9)  | 15.6(4)  |
| C10  | 9160(4)  | 8945.2(12) | 8881.8(9)  | 17.2(4)  |
| C6   | 4620(4)  | 7135.3(11) | 8837.2(9)  | 14.3(4)  |
| C14  | 6760(4)  | 7125.6(12) | 6628.9(9)  | 13.6(4)  |
| C3   | 1933(4)  | 5617.8(12) | 8485.9(10) | 16.3(4)  |
| C5   | 2620(4)  | 6828.0(12) | 9240.0(9)  | 15.3(4)  |
| C17  | 10153(3) | 6180.9(12) | 5053.6(9)  | 14.3(4)  |
| C16  | 9816(3)  | 6599.1(11) | 5739.4(9)  | 12.9(3)  |
| C8   | -830(4)  | 5760.5(13) | 9519.6(10) | 17.6(4)  |
| C7   | 585(4)   | 4777.8(12) | 8304.6(10) | 21.5(4)  |

92

93 Table A13: Anisotropic Displacement Parameters ( $\times 10^4$ ) for the riboflavin crystal obtained from a  
94 water/acetonitrile (50/50 (w/w)) solution saturated with cinnamic acid and riboflavin. The anisotropic  
95 displacement factor exponent takes the form:  $-2^2[h^2a^{*2} \times U_{11} + \dots + 2hka^* \times b^* \times U_{12}]$

| Atom | $U_{11}$ | $U_{22}$ | $U_{33}$ | $U_{23}$ | $U_{13}$ | $U_{12}$ |
|------|----------|----------|----------|----------|----------|----------|
| O4   | 13.1(6)  | 16.1(6)  | 15.8(6)  | -1.1(5)  | -1.0(5)  | -1.8(5)  |
| O6   | 14.0(7)  | 16.6(6)  | 18.9(7)  | 1.6(5)   | 4.5(5)   | 1.4(5)   |
| O2   | 14.9(7)  | 23.9(6)  | 17.0(6)  | 1.6(5)   | 2.0(5)   | 1.9(6)   |
| O5   | 14.7(7)  | 14.8(6)  | 17.3(6)  | 1.9(5)   | -1.3(6)  | -2.6(5)  |
| O3   | 14.8(7)  | 30.4(7)  | 14.1(6)  | -3.2(5)  | -0.4(6)  | 8.5(6)   |
| O1   | 33.0(9)  | 28.1(7)  | 29.5(8)  | -16.2(6) | 14.7(7)  | -12.3(7) |
| N1   | 15.8(8)  | 14.4(7)  | 11.0(7)  | -1.3(5)  | -0.7(6)  | 2.9(6)   |
| N4   | 14.9(8)  | 16.7(7)  | 13.5(7)  | 0.1(6)   | -0.2(6)  | 3.6(6)   |
| N3   | 15.8(8)  | 16.0(7)  | 16.7(8)  | -2.7(6)  | 2.0(6)   | -1.9(7)  |
| N2   | 14.5(8)  | 14.7(7)  | 13.4(7)  | -0.9(5)  | -1.4(6)  | 1.1(6)   |
| C12  | 14.0(9)  | 13.0(8)  | 12.8(8)  | 0.2(6)   | -1.3(7)  | 4.6(7)   |
| C9   | 16.3(9)  | 15.3(8)  | 11.9(8)  | -0.4(7)  | -1.2(7)  | 2.2(7)   |
| C15  | 13.4(8)  | 13.1(8)  | 10.6(8)  | 1.2(6)   | -2.0(7)  | 0.4(7)   |
| C13  | 16.0(9)  | 15.4(8)  | 10.3(8)  | -2.0(6)  | -1.0(7)  | 2.3(7)   |
| C11  | 17.0(9)  | 17.3(9)  | 12.7(9)  | 2.7(6)   | -1.0(7)  | 4.5(7)   |
| C1   | 14.1(8)  | 16.0(8)  | 11.0(8)  | 1.6(6)   | -2.2(7)  | 2.6(7)   |
| C2   | 19.1(10) | 15.0(8)  | 13.5(8)  | -2.0(6)  | -3.0(7)  | 1.6(8)   |
| C4   | 14.5(9)  | 17.6(8)  | 14.7(9)  | 3.4(7)   | -3.2(7)  | 1.7(7)   |
| C10  | 17.7(9)  | 17.5(8)  | 16.5(9)  | -1.6(7)  | 0.9(8)   | -1.0(7)  |



|            |          |         |          |         |         |         |
|------------|----------|---------|----------|---------|---------|---------|
| <b>C6</b>  | 16.1(9)  | 14.6(8) | 12.1(8)  | -0.4(6) | -3.3(7) | 1.9(7)  |
| <b>C14</b> | 11.0(9)  | 16.0(8) | 13.9(9)  | -0.3(6) | -0.6(7) | 2.4(7)  |
| <b>C3</b>  | 17.2(10) | 15.5(8) | 16.2(9)  | 0.9(7)  | -5.7(8) | 1.2(7)  |
| <b>C5</b>  | 17.1(9)  | 16.2(8) | 12.5(8)  | -0.6(7) | -1.2(7) | 2.2(7)  |
| <b>C17</b> | 12.4(9)  | 17.0(8) | 13.4(8)  | 1.4(7)  | 0.6(7)  | 1.4(7)  |
| <b>C16</b> | 12.9(8)  | 12.1(8) | 13.6(8)  | 2.3(7)  | -1.1(7) | -0.1(7) |
| <b>C8</b>  | 16.0(10) | 18.9(9) | 17.9(9)  | 2.1(7)  | -1.5(8) | -1.9(8) |
| <b>C7</b>  | 24.6(11) | 18.5(9) | 21.5(10) | -2.7(7) | -3.3(9) | -4.6(8) |

96

97 *Table A14: Bond Lengths for the riboflavin crystal obtained from a water/acetonitrile (50/50 (w/w))*  
 98 *solution saturated with cinnamic acid and riboflavin.*

| <b>Atom</b> | <b>Atom</b> | <b>Length (Å)</b> | <b>Atom</b> | <b>Atom</b> | <b>Length (Å)</b> |
|-------------|-------------|-------------------|-------------|-------------|-------------------|
| O4          | C15         | 1.431(2)          | C12         | C9          | 1.444(2)          |
| O6          | C17         | 1.432(2)          | C9          | C10         | 1.490(3)          |
| O2          | C11         | 1.232(2)          | C15         | C14         | 1.534(2)          |
| O5          | C16         | 1.436(2)          | C15         | C16         | 1.525(2)          |
| O3          | C14         | 1.430(2)          | C13         | C14         | 1.533(3)          |
| O1          | C10         | 1.210(2)          | C1          | C2          | 1.405(3)          |
| N1          | C12         | 1.368(2)          | C1          | C6          | 1.419(2)          |
| N1          | C13         | 1.480(2)          | C2          | C3          | 1.382(3)          |
| N1          | C1          | 1.391(2)          | C4          | C3          | 1.426(3)          |
| N4          | C12         | 1.317(2)          | C4          | C5          | 1.369(3)          |
| N4          | C11         | 1.365(2)          | C4          | C8          | 1.507(3)          |
| N3          | C11         | 1.397(2)          | C6          | C5          | 1.412(3)          |
| N3          | C10         | 1.378(3)          | C3          | C7          | 1.502(3)          |
| N2          | C9          | 1.299(2)          | C17         | C16         | 1.523(2)          |
| N2          | C6          | 1.366(2)          |             |             |                   |

99

100 *Table A15: Bond Angles for the riboflavin crystal obtained from a water/acetonitrile (50/50 (w/w))*  
 101 *solution saturated with cinnamic acid and riboflavin.*

| <b>Atom</b> | <b>Atom</b> | <b>Atom</b> | <b>Angle (°)</b> | <b>Atom</b> | <b>Atom</b> | <b>Atom</b> | <b>Angle (°)</b> |
|-------------|-------------|-------------|------------------|-------------|-------------|-------------|------------------|
| C12         | N1          | C13         | 117.65(16)       | C3          | C2          | C1          | 121.00(17)       |
| C12         | N1          | C1          | 120.58(15)       | C3          | C4          | C8          | 120.58(17)       |
| C1          | N1          | C13         | 121.76(16)       | C5          | C4          | C3          | 118.36(18)       |
| C12         | N4          | C11         | 118.83(16)       | C5          | C4          | C8          | 121.05(17)       |
| C10         | N3          | C11         | 125.02(16)       | O1          | C10         | N3          | 122.71(17)       |
| C9          | N2          | C6          | 117.47(16)       | O1          | C10         | C9          | 123.31(18)       |
| N1          | C12         | C9          | 116.51(16)       | N3          | C10         | C9          | 113.98(16)       |
| N4          | C12         | N1          | 118.95(16)       | N2          | C6          | C1          | 122.23(17)       |
| N4          | C12         | C9          | 124.54(17)       | N2          | C6          | C5          | 118.15(16)       |
| N2          | C9          | C12         | 124.99(17)       | C5          | C6          | C1          | 119.62(17)       |
| N2          | C9          | C10         | 118.11(16)       | O3          | C14         | C15         | 107.16(15)       |
| C12         | C9          | C10         | 116.89(17)       | O3          | C14         | C13         | 111.06(16)       |
| O4          | C15         | C14         | 109.95(14)       | C13         | C14         | C15         | 111.00(14)       |
| O4          | C15         | C16         | 110.47(14)       | C2          | C3          | C4          | 120.79(17)       |
| C16         | C15         | C14         | 112.15(15)       | C2          | C3          | C7          | 118.96(17)       |
| N1          | C13         | C14         | 110.75(15)       | C4          | C3          | C7          | 120.24(18)       |
| O2          | C11         | N4          | 120.99(17)       | C4          | C5          | C6          | 121.81(17)       |
| O2          | C11         | N3          | 118.85(17)       | O6          | C17         | C16         | 110.15(15)       |
| N4          | C11         | N3          | 120.16(17)       | O5          | C16         | C15         | 108.50(14)       |
| N1          | C1          | C2          | 123.49(17)       | O5          | C16         | C17         | 107.84(14)       |
| N1          | C1          | C6          | 118.12(16)       | C17         | C16         | C15         | 113.15(15)       |
| C2          | C1          | C6          | 118.36(17)       |             |             |             |                  |
| C3          | C2          | C1          | 121.00(17)       |             |             |             |                  |

102

103  
104  
105

*Table A16: Torsion Angles for the riboflavin crystal obtained from a water/acetonitrile (50/50 (w/w)) solution saturated with cinnamic acid and riboflavin.*

| Atom | Atom | Atom | Atom | Angle <sup>o</sup> |
|------|------|------|------|--------------------|
| O4   | C15  | C14  | O3   | -67.61(18)         |
| O4   | C15  | C14  | C13  | 53.8(2)            |
| O4   | C15  | C16  | O5   | -178.56(14)        |
| O4   | C15  | C16  | C17  | 61.81(18)          |
| O6   | C17  | C16  | O5   | 65.28(18)          |
| O6   | C17  | C16  | C15  | -174.71(14)        |
| N1   | C12  | C9   | N2   | 2.8(3)             |
| N1   | C12  | C9   | C10  | -176.05(16)        |
| N1   | C13  | C14  | O3   | -51.5(2)           |
| N1   | C13  | C14  | C15  | -170.61(15)        |
| N1   | C1   | C2   | C3   | 177.66(17)         |
| N1   | C1   | C6   | N2   | 0.5(3)             |
| N1   | C1   | C6   | C5   | -179.54(16)        |
| N4   | C12  | C9   | N2   | -177.02(17)        |
| N4   | C12  | C9   | C10  | 4.2(3)             |
| N2   | C9   | C10  | O1   | -5.2(3)            |
| N2   | C9   | C10  | N3   | 175.02(17)         |
| N2   | C6   | C5   | C4   | -178.62(17)        |
| C12  | N1   | C13  | C14  | -80.7(2)           |
| C12  | N1   | C1   | C2   | -175.82(16)        |
| C12  | N1   | C1   | C6   | 2.1(2)             |
| C12  | N4   | C11  | O2   | 172.62(16)         |
| C12  | N4   | C11  | N3   | -7.4(2)            |
| C12  | C9   | C10  | O1   | 173.67(19)         |
| C12  | C9   | C10  | N3   | -6.1(2)            |
| C9   | N2   | C6   | C1   | -1.4(3)            |
| C9   | N2   | C6   | C5   | 178.61(17)         |
| C13  | N1   | C12  | N4   | -5.0(2)            |
| C13  | N1   | C12  | C9   | 175.21(16)         |
| C13  | N1   | C1   | C2   | 5.4(3)             |
| C13  | N1   | C1   | C6   | -176.61(15)        |
| C11  | N4   | C12  | N1   | -177.03(16)        |
| C11  | N4   | C12  | C9   | 2.7(3)             |
| C11  | N3   | C10  | O1   | -177.96(19)        |
| C11  | N3   | C10  | C9   | 1.8(3)             |
| C1   | N1   | C12  | N4   | 176.18(16)         |
| C1   | N1   | C12  | C9   | -3.6(2)            |
| C1   | N1   | C13  | C14  | 98.09(19)          |
| C1   | C2   | C3   | C4   | 2.1(3)             |
| C1   | C2   | C3   | C7   | -177.16(17)        |
| C1   | C6   | C5   | C4   | 1.4(3)             |
| C2   | C1   | C6   | N2   | 178.59(16)         |
| C2   | C1   | C6   | C5   | -1.5(3)            |
| C10  | N3   | C11  | O2   | -174.86(17)        |
| C10  | N3   | C11  | N4   | 5.2(3)             |
| C6   | N2   | C9   | C12  | -0.2(3)            |
| C6   | N2   | C9   | C10  | 178.57(16)         |
| C6   | C1   | C2   | C3   | -0.3(3)            |
| C14  | C15  | C16  | O5   | -55.52(18)         |
| C14  | C15  | C16  | C17  | -175.15(14)        |
| C3   | C4   | C5   | C6   | 0.4(3)             |
| C5   | C4   | C3   | C2   | -2.2(3)            |
| C5   | C4   | C3   | C7   | 177.12(17)         |
| C16  | C15  | C14  | O3   | 169.05(15)         |
| C16  | C15  | C14  | C13  | -69.53(19)         |
| C8   | C4   | C3   | C2   | 179.21(17)         |

|    |    |    |    |            |
|----|----|----|----|------------|
| C8 | C4 | C3 | C7 | -1.5(3)    |
| C8 | C4 | C5 | C6 | 178.99(17) |

106

107

108

109

110

*Table A17: Hydrogen Fractional Atomic Coordinates ( $\times 10^4$ ) and Equivalent Isotropic Displacement Parameters ( $\text{\AA}^2 \times 10^3$ ) for the riboflavin crystal obtained from a water/acetonitrile (50/50 (w/w)) solution saturated with cinnamic acid and riboflavin.  $U_{eq}$  is defined as 1/3 of the trace of the orthogonalized  $U_{ij}$ .*

| Atom | x         | y        | z        | $U_{eq}$ |
|------|-----------|----------|----------|----------|
| H17A | 9360(50)  | 6552(14) | 4717(12) | 21(6)    |
| H5A  | 2300(40)  | 7174(14) | 9646(12) | 12(5)    |
| H15  | 6140(40)  | 6960(14) | 5646(10) | 13(5)    |
| H17B | 9500(40)  | 5579(13) | 5028(10) | 6(5)     |
| H13A | 7270(50)  | 5980(16) | 7202(11) | 20(6)    |
| H13B | 9740(50)  | 6610(14) | 7183(11) | 14(5)    |
| H14  | 7650(50)  | 7710(15) | 6599(11) | 18(6)    |
| H8A  | -1110(50) | 6135(16) | 9887(13) | 29(6)    |
| H16  | 10800(40) | 6236(13) | 6077(11) | 18(5)    |
| H2   | 4250(40)  | 5610(13) | 7664(11) | 14(5)    |
| H6   | 13360(50) | 6584(17) | 4776(13) | 28(7)    |
| H8B  | -2390(50) | 5660(15) | 9280(13) | 27(6)    |
| H3A  | 12200(50) | 9597(18) | 8631(13) | 33(7)    |
| H8C  | -450(50)  | 5191(16) | 9738(13) | 29(6)    |
| H3   | 4000(60)  | 7654(17) | 7030(15) | 38(8)    |
| H7A  | 1410(50)  | 4485(15) | 7898(13) | 27(6)    |
| H7B  | -1230(60) | 4889(17) | 8224(13) | 32(7)    |
| H7C  | 800(50)   | 4333(17) | 8691(14) | 41(8)    |
| H5   | 11920(60) | 7515(18) | 6042(16) | 44(8)    |
| H4   | 4960(60)  | 5699(17) | 5728(14) | 37(8)    |

111

## 112 9.4 NMR experiments with riboflavin in deuterated dimethyl sulfoxide

113 The assignment of atom numbers to RF for NMR analysis is given in Figure 2 in the

114 Introduction. The  $^{13}\text{C}$ - and  $^1\text{H}$ -NMR spectrum of RF in DMSO- $d_6$  are shown in Figure A2 and

115 A3 below. The attribution to the protons and carbons is given in Table A18 and A19. The

116 protons H1, H13/H14 were attributed to the atoms via the chemical shift. The protons H5, H8,

117 H4, H6, H7 and H9 were assigned via the splitting and H11 with via its integral. COSY, NOESY,

118 HSQC and HMBC measurements were used to verify the attribution, see Figure A4-A7.

119 Moreover, the chemical shift was used to assign the atoms to the signals.[62]

120 The HSQC spectrum allowed to assign C17 to H14 and C12 to H13. Protons of the sugar chain

121 were attributed via HSQC as followed: H12 to C5', H11 to C5'/C3'/C4', H10 to C2' and H8/5 to

122 C1'. H2 and H3 coupled with C9 and C6 respectively. With the help of HMBC, the OH-groups

123 of RF comprising H9, H7, H6 and H4 could be attributed.

124

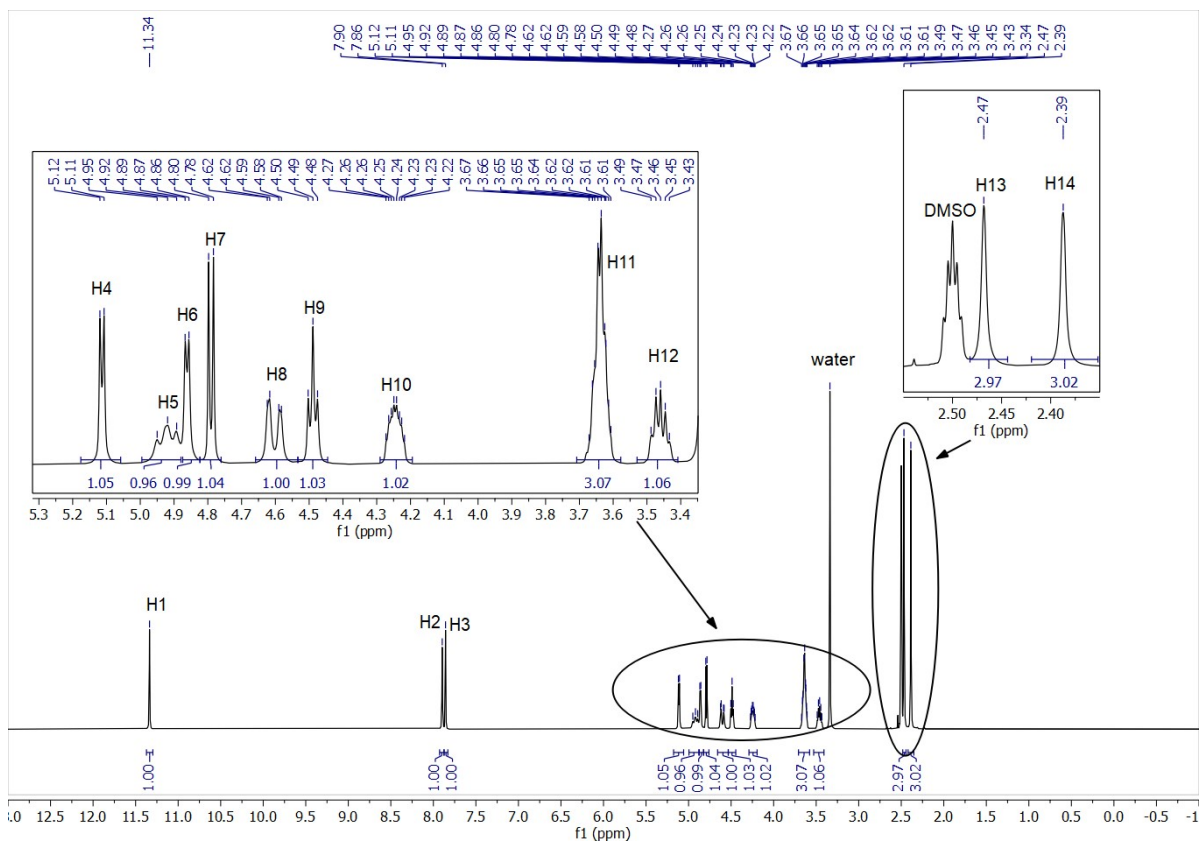

125

126

Figure A2:  $^1\text{H-NMR}$  spectrum of riboflavin in  $\text{DMSO-d}_6$  (saturation)

127

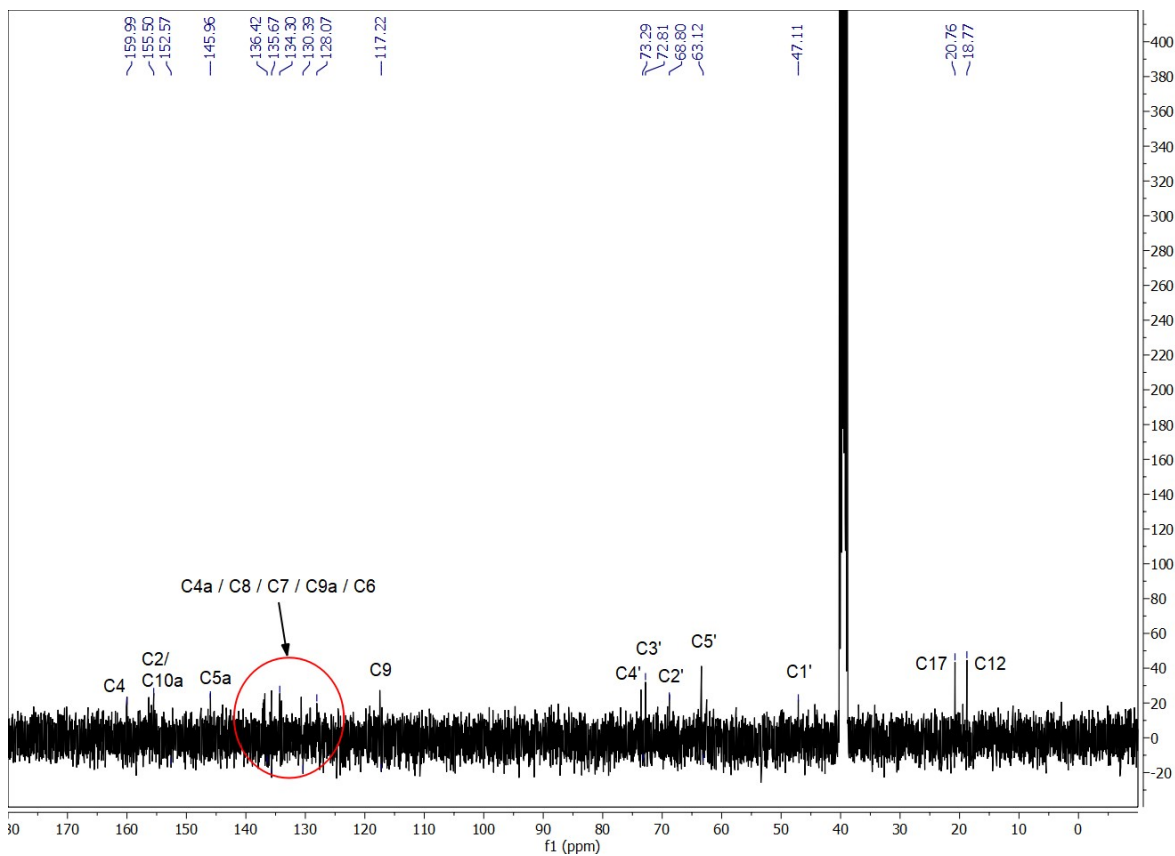

128

129

Figure A3:  $^{13}\text{C-NMR}$  spectrum of riboflavin in  $\text{DMSO-d}_6$  (saturation)

130

131 Table A18: Attribution of  $^1\text{H}$ -NMR signals to riboflavin's atoms, see Figure A2. The COSY, NOESY,  
 132 HSQC and HMBC spectrum were used for validation of the attribution see Figure A4-A7. s = singlet, d  
 133 = doublet, t = triplet, m = multiplet.

| Proton | $\delta$ (ppm) | Number of protons | Splitting | Coupling (Hz)             | Attribution via       |
|--------|----------------|-------------------|-----------|---------------------------|-----------------------|
| 1      | 11.34          | 1                 | s         | -                         | Shift                 |
| 2      | 7.90           | 1                 | s         | -                         | HSQC                  |
| 3      | 7.86           | 1                 | s         | -                         | HSQC                  |
| 4 (OH) | 5.11           | 1                 | d         | $^3\text{J}(4-11) = 4.95$ | HMBC                  |
| 5/8    | 4.92           | 1                 | t         | $^2\text{J}(5-8) = 10.51$ | HSQC, Integral, Shift |
| 6 (OH) | 4.86           | 1                 | d         | $^3\text{J}(6-11) = 4.68$ | HMBC                  |
| 7 (OH) | 4.79           | 1                 | d         | $^3\text{J}(7-10) = 5.84$ | HMBC                  |
| 8/5    | 4.60           | 1                 | d         | $^2\text{J}(8-5) = 13.65$ | COSY                  |
| 9 (OH) | 4.49           | 1                 | t         | $^2\text{J}(9-11) = 5.68$ | Splitting/HMBC        |
| 10     | 4.25           | 1                 | m         | Not resolved              | COSY                  |
| 11     | 3.64           | 3                 | m         | Not resolved              | COSY                  |
| 12     | 3.46           | 1                 | m         | Not resolved              | COSY                  |
| 13     | 2.47           | 3                 | s         | -                         | HSQC                  |
| 14     | 2.39           | 3                 | s         | -                         | HSQC                  |

134

135

136 Table A19: Attribution of  $^{13}\text{C}$ -NMR signals to riboflavin's carbon atoms from Figure A3. The atoms  
 137 attributed via HSQC are indicated in brackets, see Figure A5. All other atoms were attributed via the  
 138 chemical shift.[62] C9a was not certain, as the noise was too strong.

| Carbon | $\delta$ (ppm) | Carbon | $\delta$ (ppm) |
|--------|----------------|--------|----------------|
| 4      | 159.99         | 9      | 117.22 (HSQC)  |
| 10a    | 155.50         | 3'     | 72.81 (HSQC)   |
| 2      | 152.57         | 4'     | 73.29(HSQC)    |
| 5a     | 145.96         | 2'     | 68.80 (HSQC)   |
| 4a     | 136.42         | 5'     | 63.12 (HSQC)   |
| 8      | 135.67         | 1'     | 47.11 (HSQC)   |
| 7      | 134.30         | 12     | 20.76 (HSQC)   |
| 9a*    | 134.01/128.07  | 17     | 18.77 (HSQC)   |
| 6      | 130.39 (HSQC)  |        |                |

139

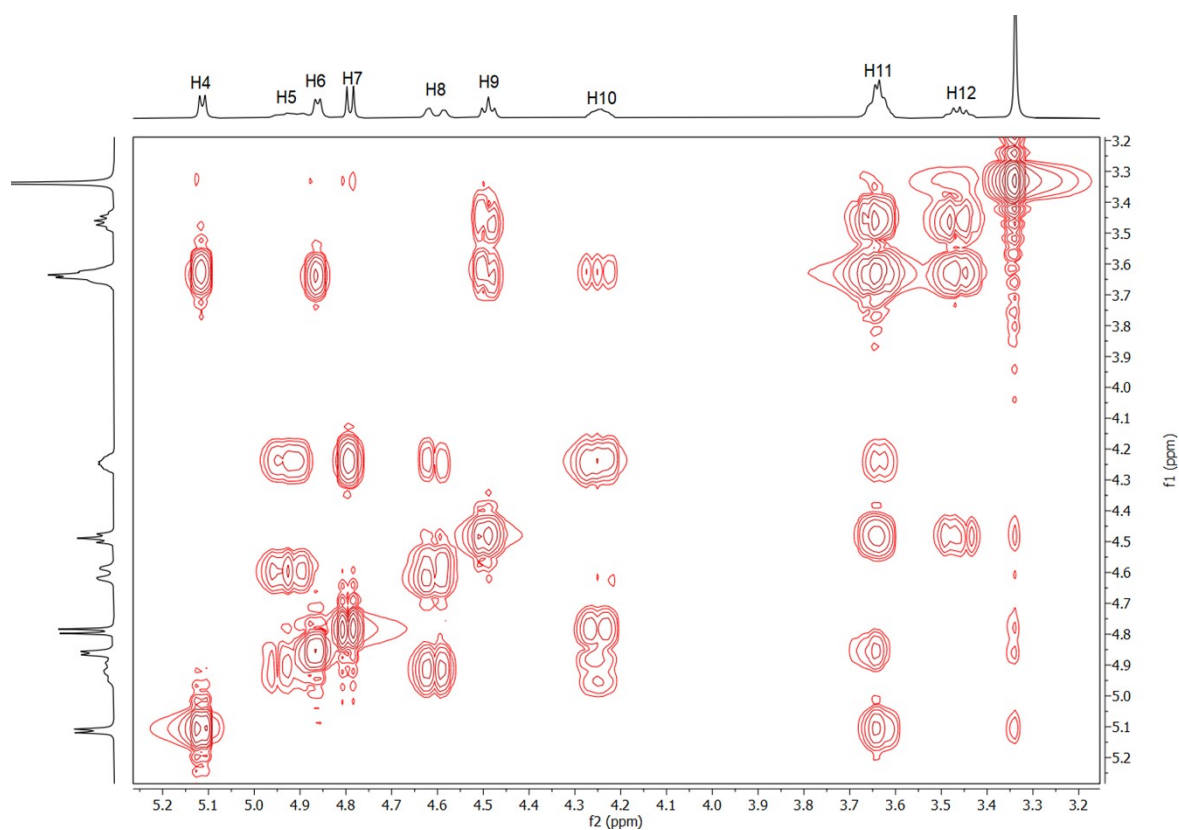

140

141 Figure A4: COSY spectrum of riboflavin in DMSO-d<sub>6</sub> (saturation). The following interactions were visible:  
 142 H12 with H9/11; H11 with H6/H4/H10/H12/H9; H10 with H8/H5/H11; H8 with H5/H10.

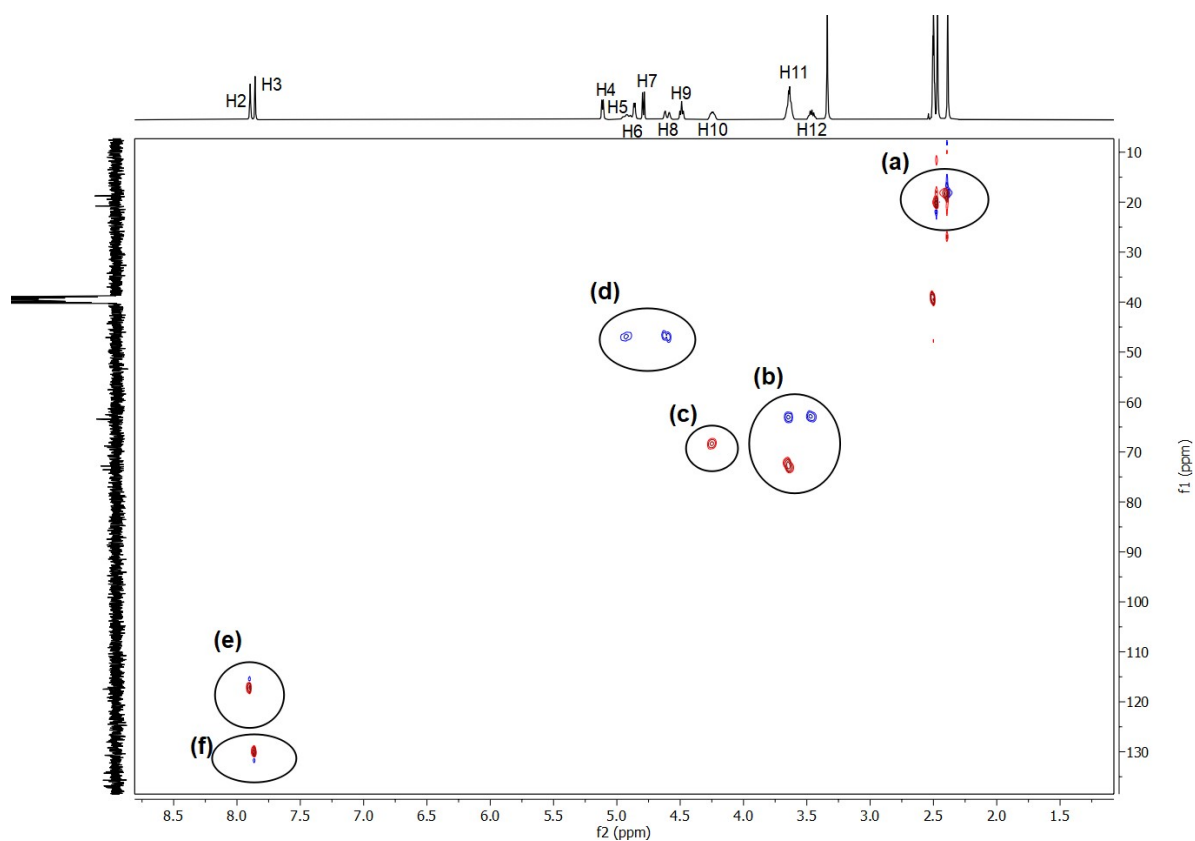

143

144 Figure A5: HSQC spectrum of riboflavin in DMSO-d<sub>6</sub> (saturation). The protons could be attributed to the  
 145 following carbons atoms: (a) C17 to H14 and C12 to H13 - (b) C5' to H12 and C5'/C3'/C4' to H11 - (c)  
 146 C2' to H10 - (d) C1 to H8/5 - (e) C6 to H3 - (f) C9 to H2

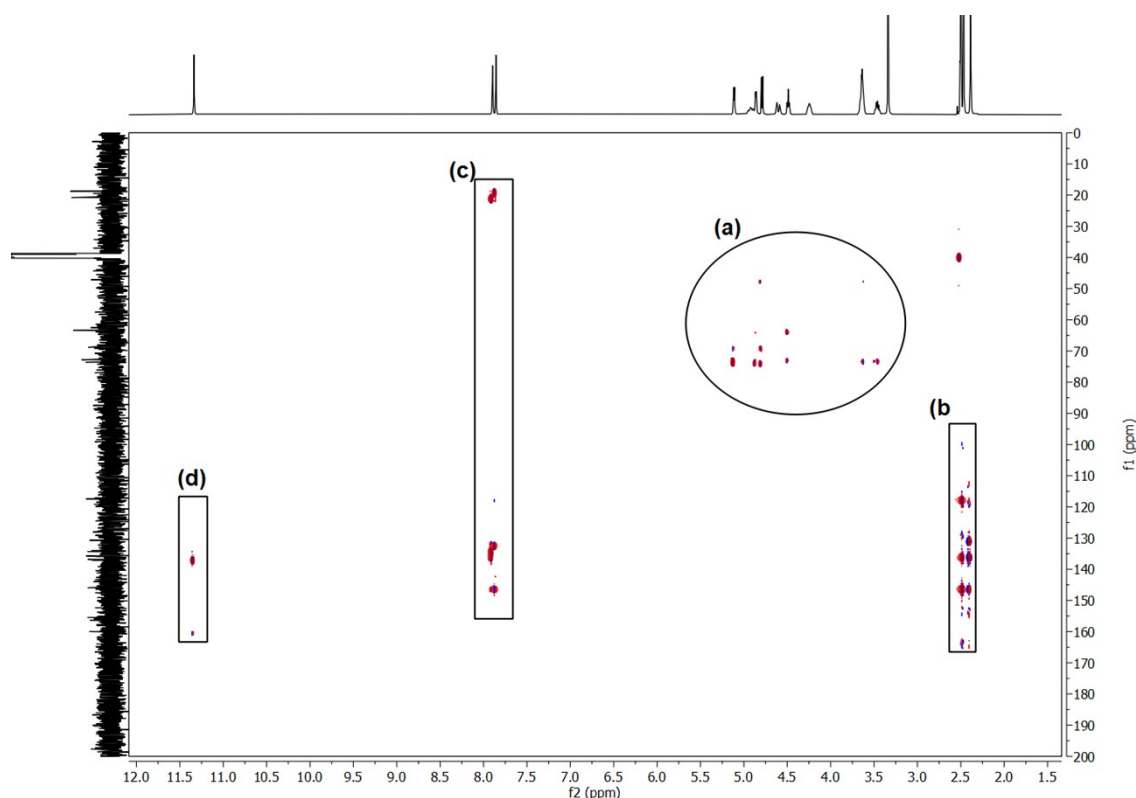

147

148 Figure A6: HMBBC spectrum of riboflavin in DMSO- $d_6$  (saturation). The following cross peaks are visible:  
 149 (a) C3'/C4'-H12 and C3'/C4'-H11 and C5'/C3'/C4'-H9 and C4'/C2'/C1'-H7 and C4'-H6 and C4'/C2'/C3'-  
 150 H4 – (b) C9/C6/C9a/C7/C8/C5a/C4a-H13/14 – (c) C12/C17/C6/C9a/C7/C8/C5a/C4a/C9-H2/3 – (d)  
 151 C4a/C4-H1.

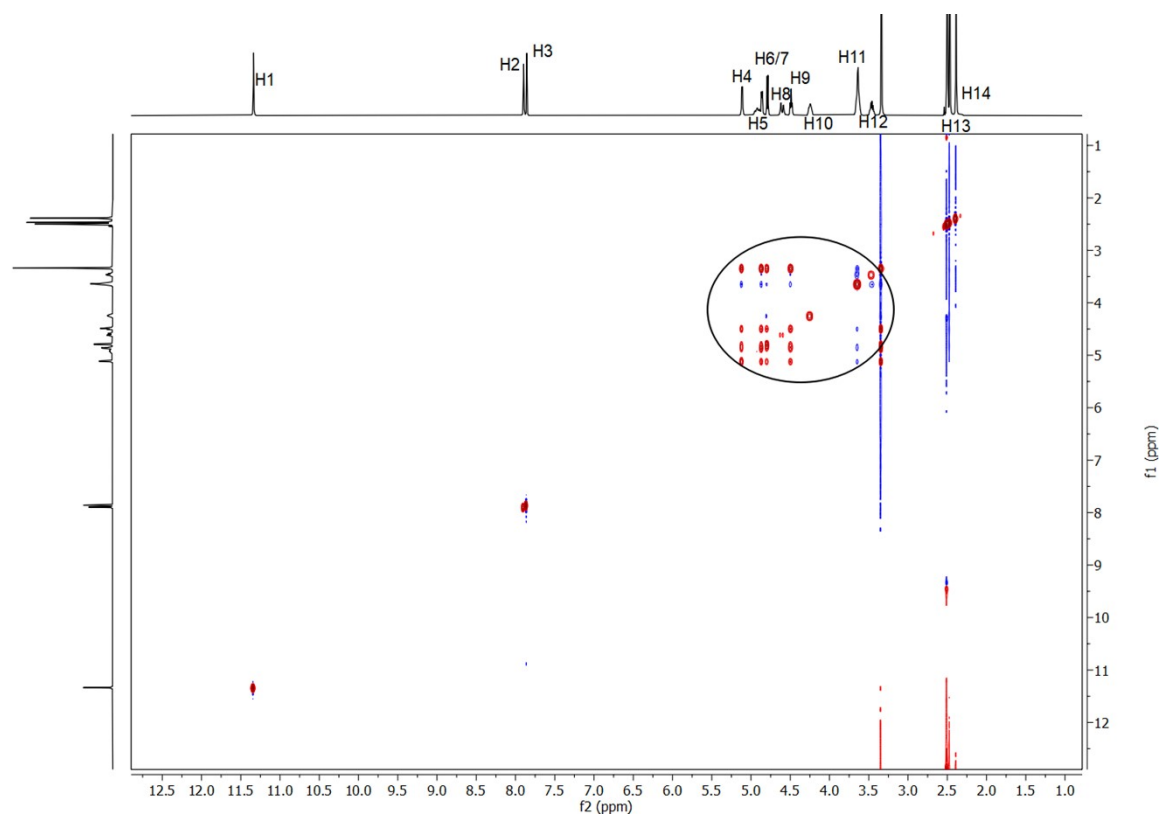

152

153 Figure A7: NOESY spectrum of riboflavin in DMSO- $d_6$  (saturation). The interactions of the sugar chain  
 154 were marked with a circle. The interactions, which were depicted in -Figure A4 above, are visible in the  
 155 NOESY spectrum, too. Additionally, a cross-peak between H10 and H7 was found. Therefore, H7  
 156 belonged to the OH-group nearest to the isoalloxazine ring.

157 **9.5 NMR experiments with riboflavin 5'-monophosphate sodium salt in**  
 158 **deuterium oxide**

159 The <sup>1</sup>H-NMR and <sup>13</sup>C-NMR spectrum is given in Figure A8 and A9. The protons were attributed  
 160 via the COSY, NOESY, HSQC and HMBC spectrum and via comparison with the peak  
 161 attribution of the riboflavin protons.

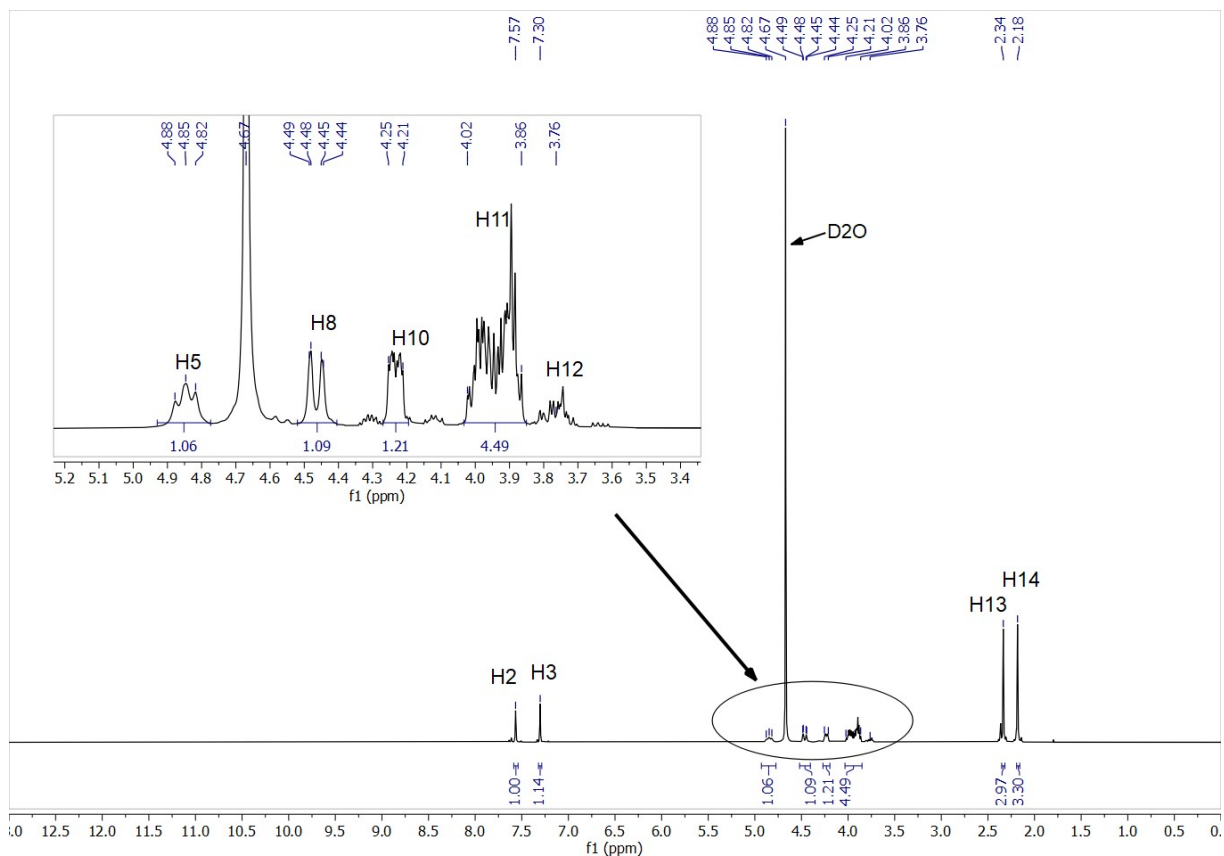

162

163 *Figure A8: <sup>1</sup>H-NMR spectrum of riboflavin 5'-monophosphate sodium salt in deuterium oxide*  
 164 *(saturation).*

165

166 *Table A20: Attribution of <sup>1</sup>H-NMR signals from Figure A8 to RF-PO<sub>4</sub> protons via the chemical shift  $\delta$ , the*  
 167 *integrals, the splitting and coupling constants. The right column shows the interactions observed from*  
 168 *the NOESY spectrum in Figure 7 in section 3.4. vis. = visible, s = singlet, d = doublet, t = triplet, m =*  
 169 *multiplet.*

| Proton | $\delta$ (ppm) | Number of protons | Splitting | Coupling (Hz)               | NOESY              |
|--------|----------------|-------------------|-----------|-----------------------------|--------------------|
| 1      | Not vis.       | 1                 | -         | -                           |                    |
| 2      | 7.57           | 1                 | s         | -                           | H13, H10<br>H8, H5 |
| 3      | 7.30           | 1                 | s         | -                           | H14                |
| 4 (OH) | Not vis        | -                 | -         | -                           |                    |
| 5      | 4.85           | 1                 | t         | <sup>2</sup> J(5-8) = 12.72 | H2                 |
| 6 (OH) | Not vis        | -                 | -         | -                           |                    |
| 7 (OH) | Not vis        | -                 | -         | -                           |                    |
| 8      | 4.46           | 1                 | d         | <sup>2</sup> J(8-5) = 14.60 | H2                 |



|    |      |   |   |   |    |
|----|------|---|---|---|----|
| 10 | 4.23 | 1 | m |   | H2 |
| 11 | 3.94 | 3 | m |   |    |
| 12 | 3.76 | 1 | m |   |    |
| 13 | 2.33 | 3 | s | - | H2 |
| 14 | 2.18 | 3 | s | - | H3 |

170

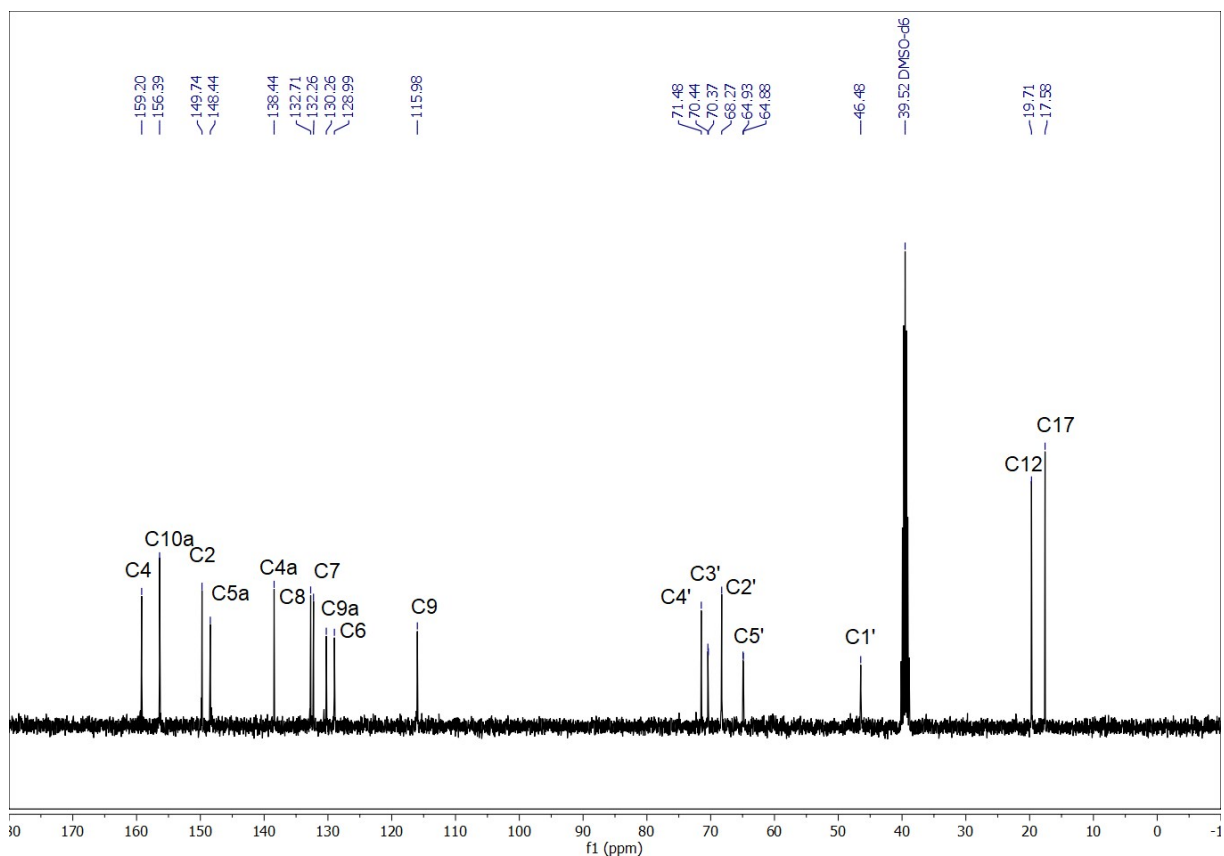

171

172 Figure A9:  $^{13}\text{C}$ -NMR spectrum of riboflavin 5'-monophosphate sodium salt in deuterium oxide  
 173 (saturation). To have a reference an NMR tube with  $\text{DMSO-d}_6$  was inserted

174

175 Table A21: Attribution of  $^{13}\text{C}$ -NMR signals from Figure A9 to  $\text{RF-PO}_4$  carbons via the chemical shift  $\delta$ ,  
 176 the HSQC and HMBC spectrum from Figure A10 and A11. C3' and C5' yielded in two signals probably  
 177 due to different degrees of protonation and different conformations of the ribityl chain.

| Carbon | $\delta$ (ppm) | HSQC   | HMBC         |
|--------|----------------|--------|--------------|
| 4      | 159.20         |        |              |
| 2      | 156.39         |        | H3, H14, H13 |
| 10a    | 149.75         |        |              |
| 4a     | 138.44         |        | H2, H13, H14 |
| 5a     | 148.44         |        |              |
| 8      | 132.70         |        | H2, H13      |
| 7      | 132.26         |        | H3, H14      |
| 9a     | 130.26         |        |              |
| 6      | 128.99         | H3     |              |
| 9      | 115.98         | H2     | H13          |
| 4'     | 71.48          | H11/12 | H11, H12     |

17

|    |             |         |         |
|----|-------------|---------|---------|
| 3' | 70.44/70.37 | H11/12  |         |
| 2' | 68.27       | H10     |         |
| 5' | 64.93/64.88 | H11/12  | H12     |
| 1' | 46.48       | H8 / H5 |         |
| 12 | 19.71       | H13     | H2, H14 |
| 17 | 17.58       | H14     | H3, H13 |

178

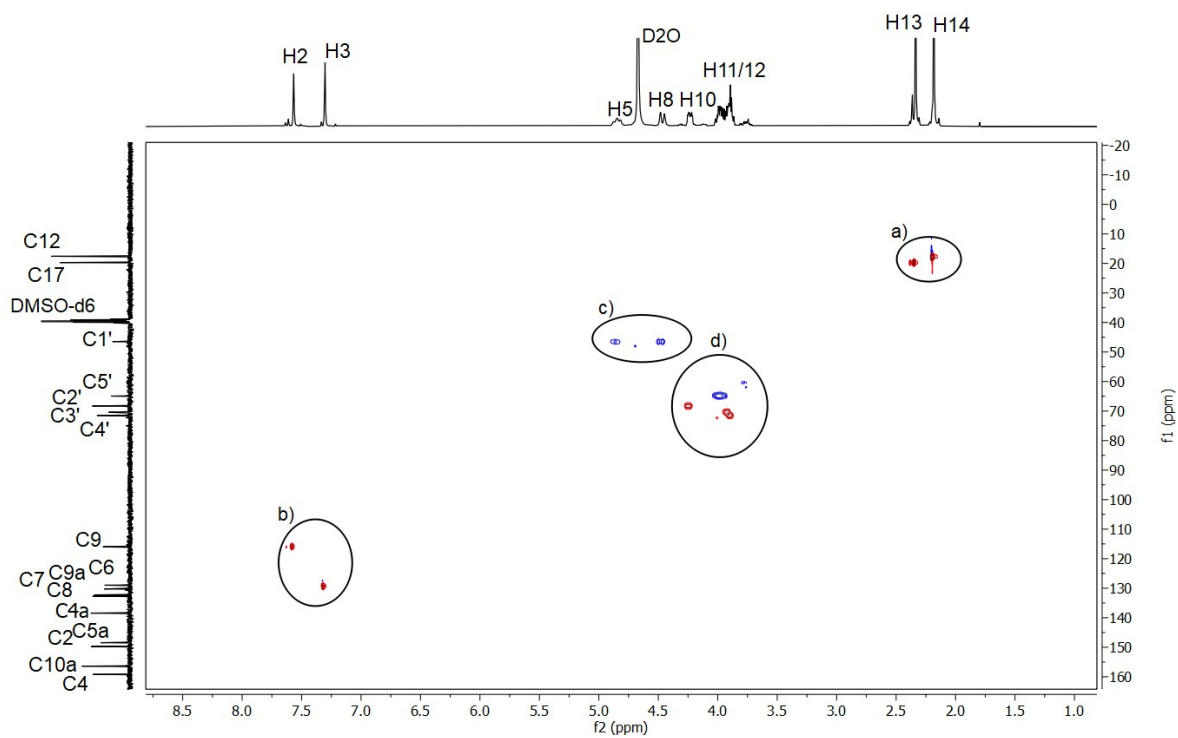

179

180 Figure A10: HSQC NMR spectrum of riboflavin 5'-monophosphate in deuterium oxide (saturation). To  
 181 have a reference in  $^{13}\text{C}$ -NMR tube with  $\text{DMSO-d}_6$  was inserted.  $^1\text{H}$ -NMR was conducted in deuterium  
 182 oxide only. The following cross peaks are present: a) H14/H13 with C17/C12, b) H2 with C9; H3 with  
 183 C6, c) H5 and H8 with C1', d) H11 with C5', C3', C4' and H10 with C2'.

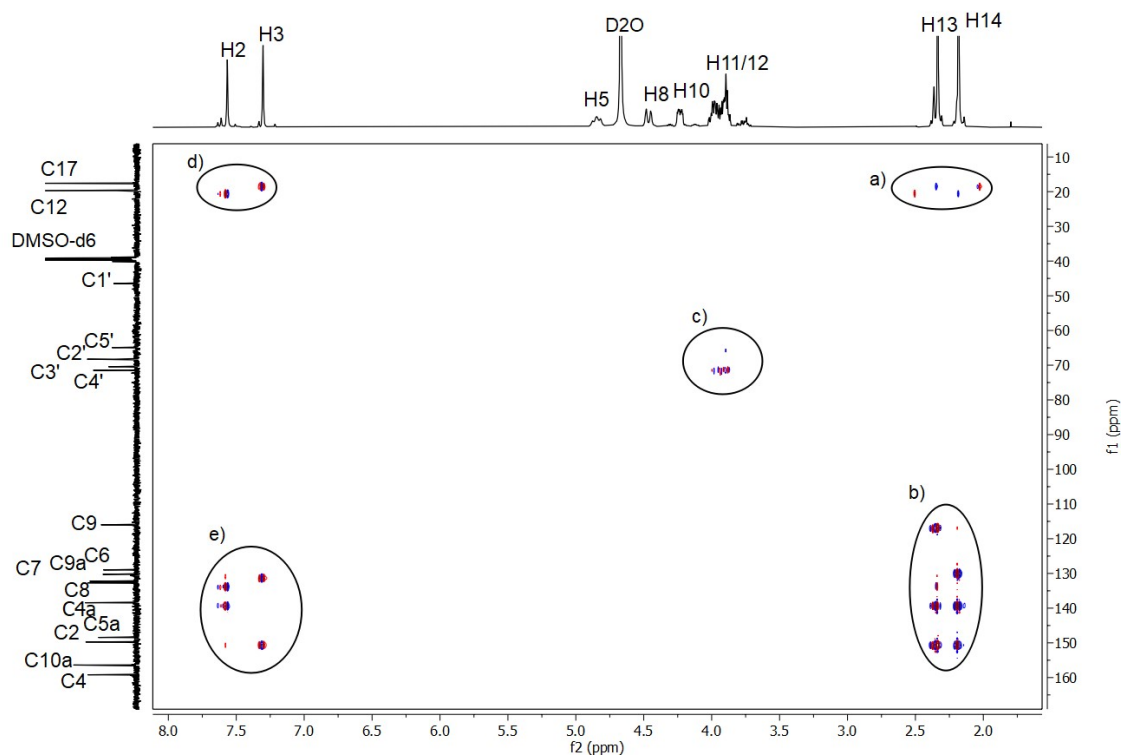

184

185 *Figure A11: HMBC NMR spectrum of riboflavin 5'-phosphate sodium salt in D<sub>2</sub>O (saturation). To have*  
 186 *a reference in <sup>13</sup>C-NMR tube with DMSO-d<sub>6</sub> was inserted. <sup>1</sup>H-NMR was conducted in deuterium oxide*  
 187 *only. The following cross peaks are present: a) H14 with C12 and H13 with C17, b) H13 with C9, C8,*  
 188 *C4a, C2 and H14 with C7, C4a, C2, c) H12 with C5' and H11/H12 with C4', d) H3 with C17 and H2 with*  
 189 *C12, e) H3 with C7, C2 and H2 with C8, C4a.*

190

191

192

193

194

195

196

197

198

199

200

201

202

203

204 9.6 Computational Details

205 9.6.1 Molecular dynamics

206

A)

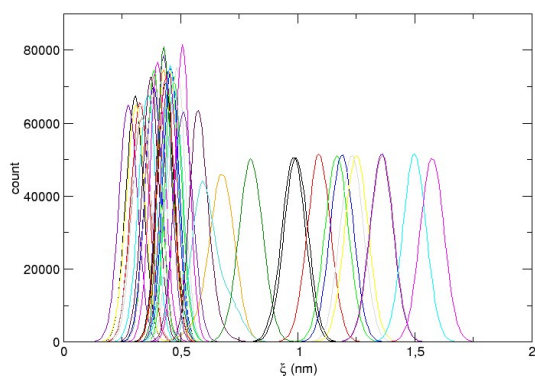

B)

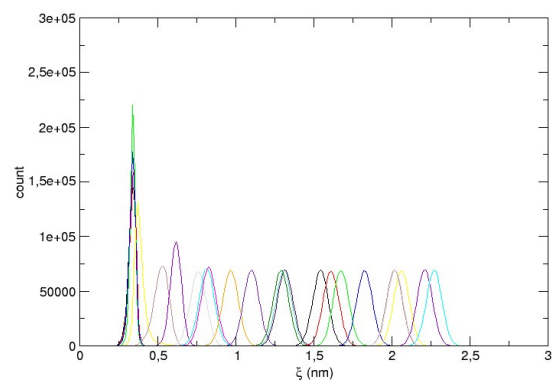

207 Figure A12. Histogram of the Umbrella sampling for the separation of 2 RF (A) and 2 LC (B) molecules.

208

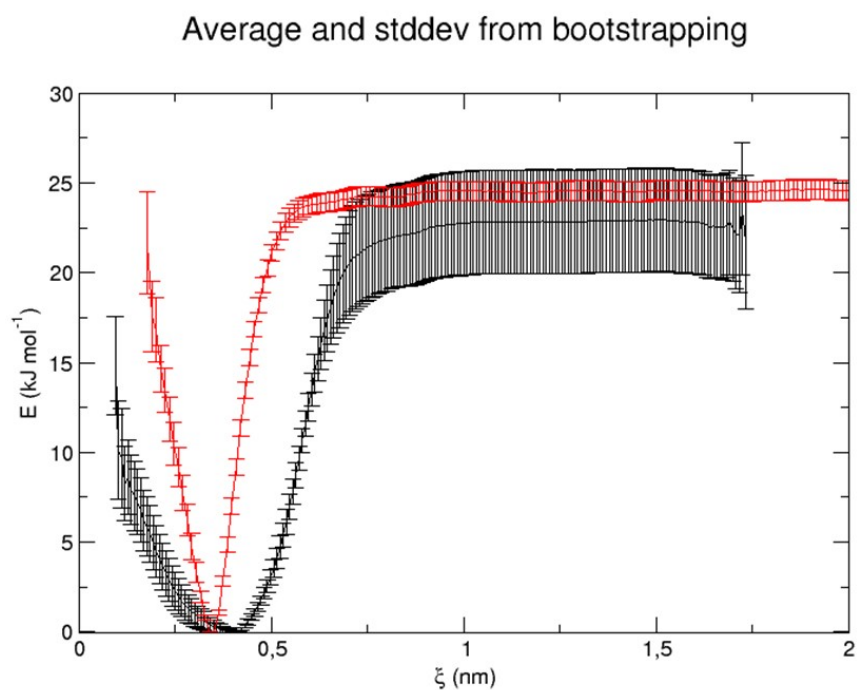

209

210 Figure A13. Standard error from bootstrapping of the umbrella sampling. Red: average PMF and  
211 standard error for LC; black: average PMF and standard error for RF.

212

213

214

215

216

## 217 9.6.2 COSMO-RS calculation

218 Conformational sampling of riboflavin was done using COSMOconf 2021.[63] All together 20  
219 unique conformations were obtained by the procedure. The conformations were be classified  
220 according to the internal hydrogen bond constructed between N1/O2 and various OH-groups  
221 of the ribityl chains. Figure A14 depicts superimposed flavin ring of RF molecules for each  
222 class. Subsequently, solubility calculation of averaged molecule and separated conformations  
223 was performed using COSMOtherm 2022 using non-iterative procedure.[64–67]

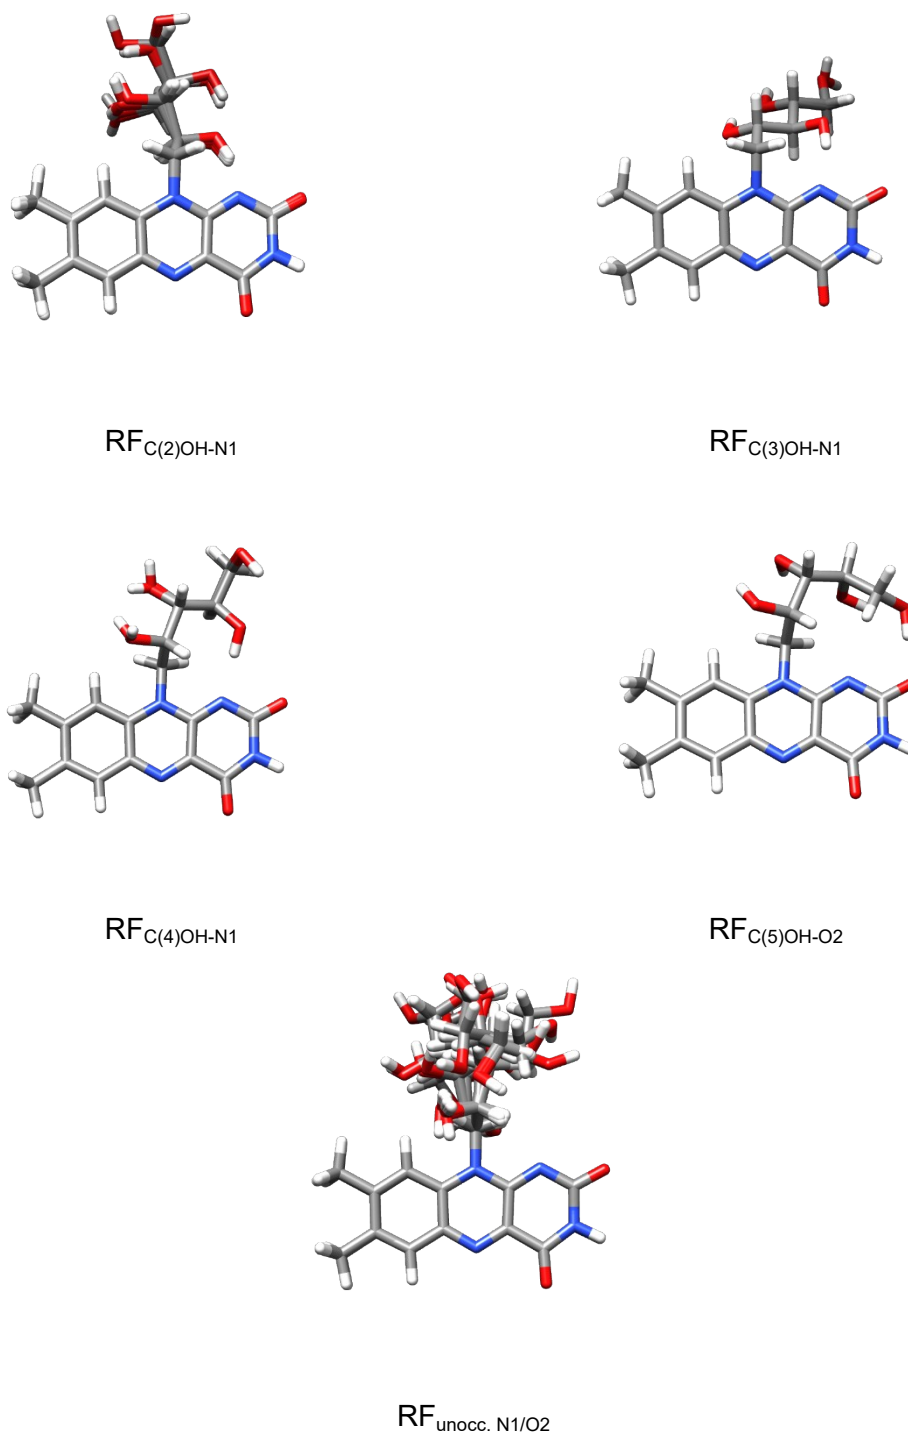

224

Figure A14. Conformational space calculated by COSMOconf.[63]
